# Supplementary material for: Generation of Cortical Brain Organoid with Vascularization by Assembling with Vascular Spheroid
Source: PubMed Central journal article supplement — Int J Stem Cells. 2022 Feb 28;15(1):85–94. doi: 10.15283/ijsc21157 (PMC8889335; doi:10.15283/ijsc21157), 2022-02-28
Supplement: ijsc-15-1-85-supple.pdf [file ijsc-15-1-85-supple.pdf]

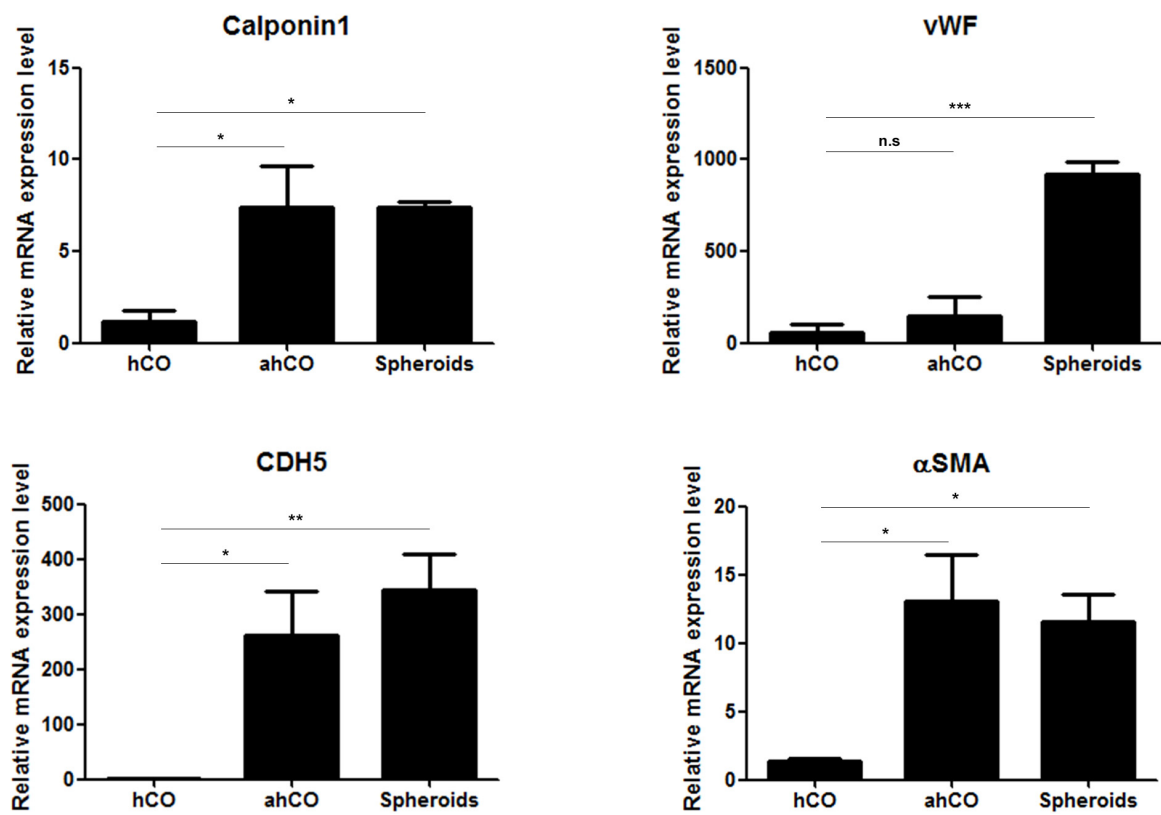

**Fig. S1.** mRNA expression levels of the endothelial markers calponin1, CDH5, vWF and  $\alpha$ -SMA in each sample on day 43. One-way ANOVA analysis,  $n=5\sim6$ . \* $p<0.05$ , \*\* $p<0.01$ , \*\*\* $p<0.001$ ; n.s. not significant.

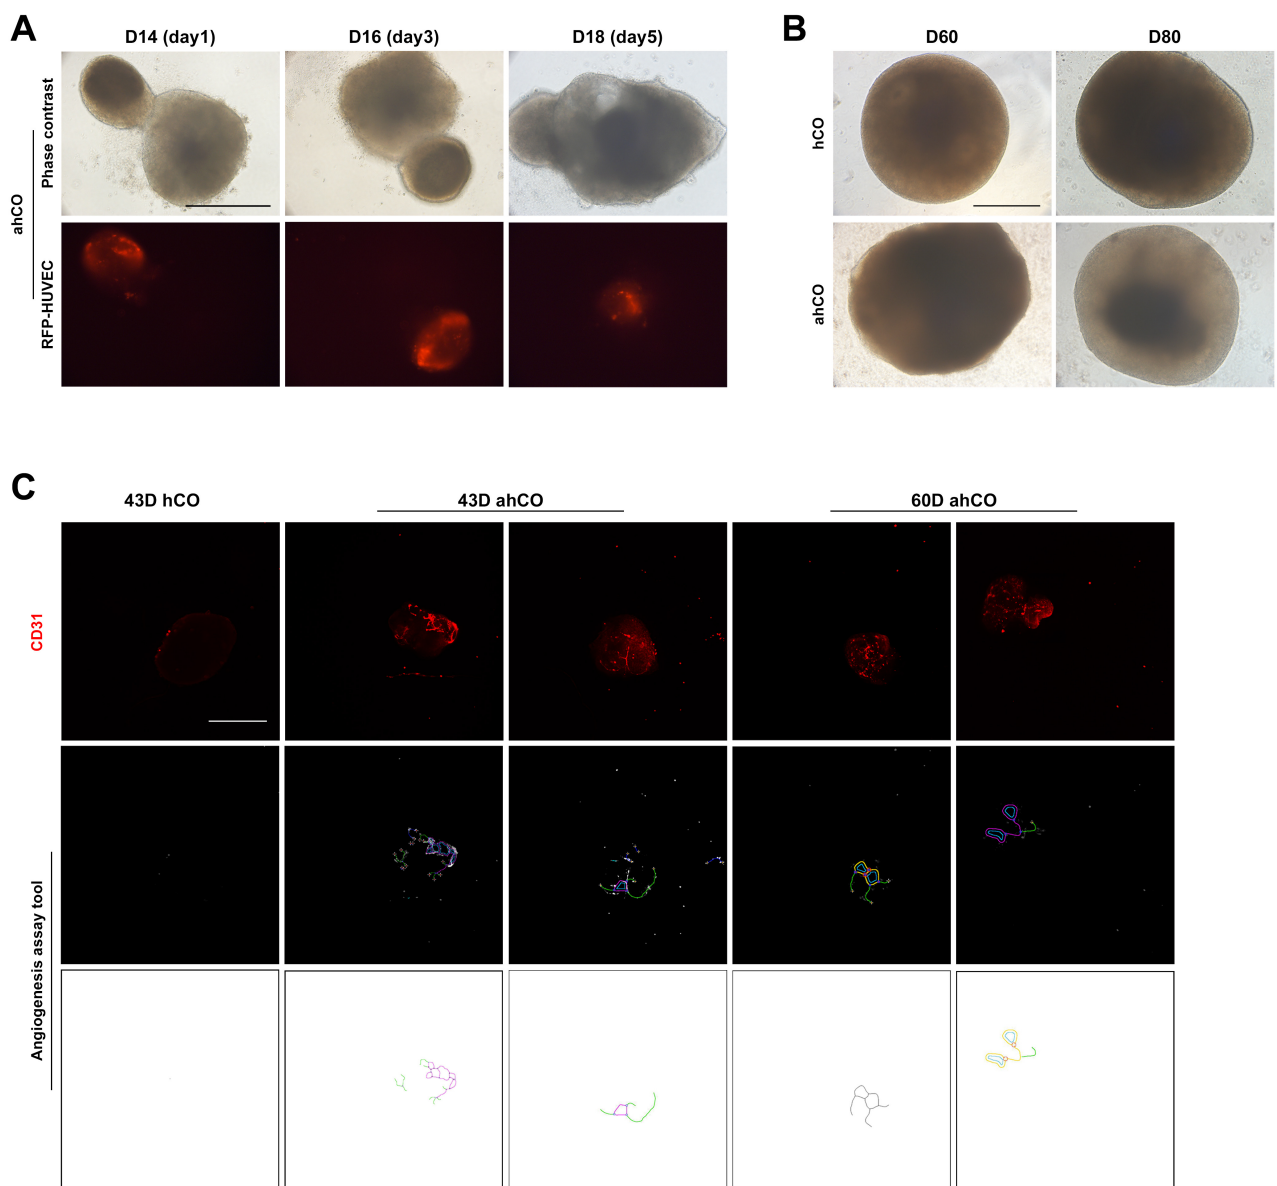

**Fig. S2.** (A) Organization of vascular was expressed by RFP-expressing HUVECs within organoids (Scale bar: 500  $\mu$ m). (B) Both organoids, hCO and ahCO, were maintained during 80 days (Scale bar: 1 mm). (C) AngioTool analysis indicating the abundance of vasculature-like structures within organoids (Scale bar: 1 mm).

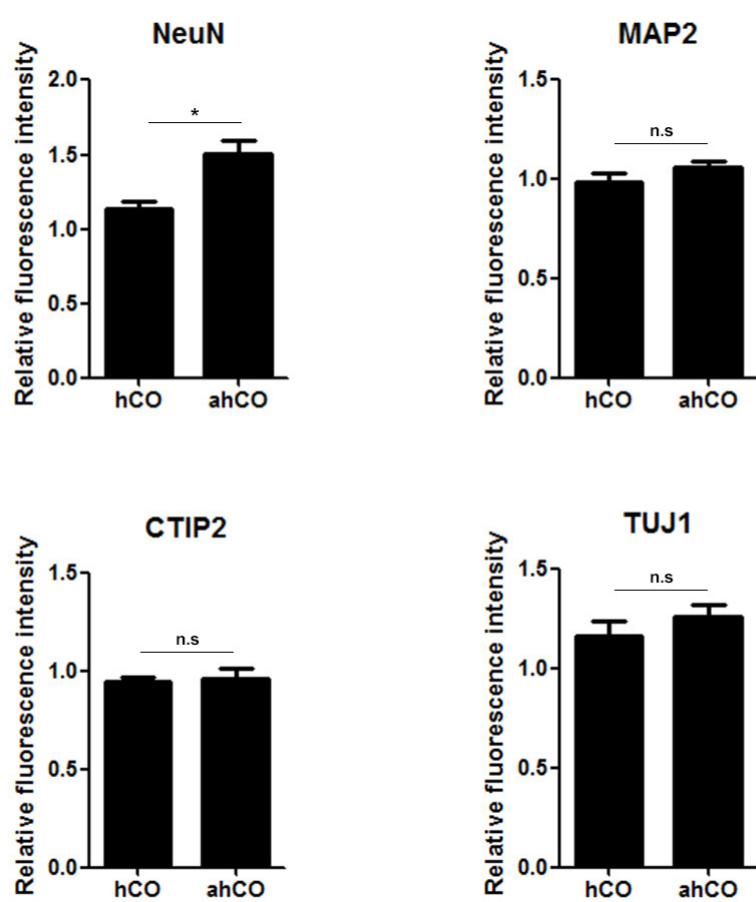

**Fig. S3.** The neuronal markers staining intensity was quantified in each group. The staining intensity of NeuN was increased by 38.2% in the ahCO groups compared with the control organoid groups. Student's t-test,  $n=3$ , independent organoids from 2 different batches. \* $p<0.05$ , n.s. not significant.

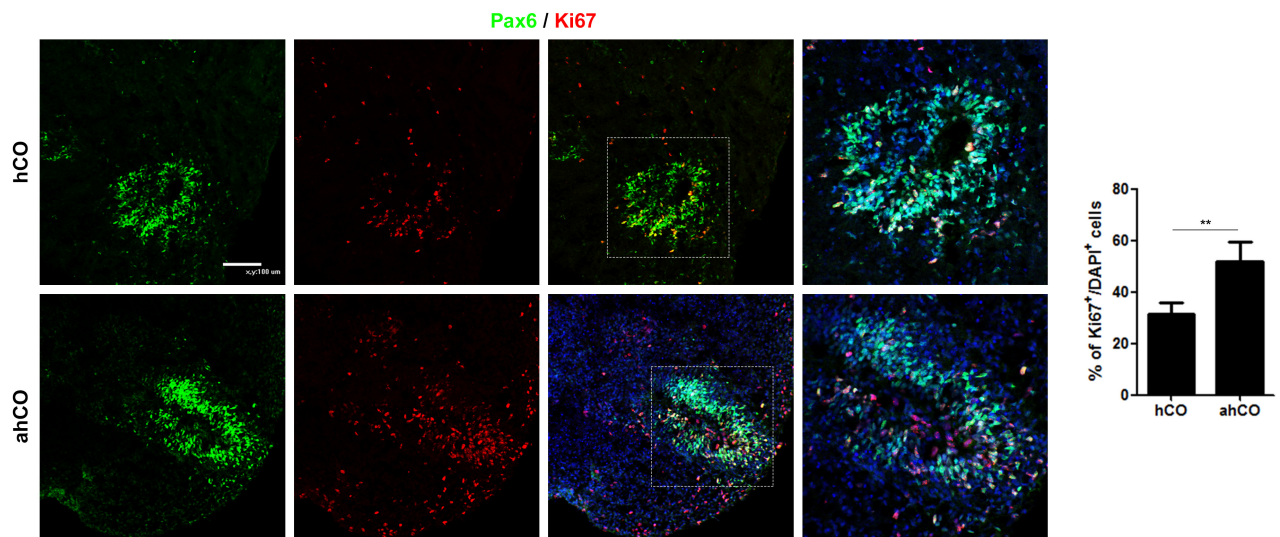

**Fig. S4.** Cellular proliferation were represented by Ki67 immunostaining and percentage of Ki67<sup>+</sup> cells in DAPI<sup>+</sup> cells in each group (Scale bar: 100 μm). Student's t-test, n=3, independent organoids from 2 different batches. \*\*p<0.01.
